# Supplementary material
Source: PubMed Central journal article supplement (PMC3248549)
Supplement: 1113077108_pnas.1113077108_SI.pdf [file 1113077108_pnas.1113077108_SI.pdf]

# Supporting Information

Culurgioni et al. 10.1073/pnas.1113077108

## SI Materials and Methods

**Protein Preparation.** GST-Pins<sup>25–444</sup>:Insc<sup>252–263</sup> was purified by affinity and anion-exchange. All Pins and LGN mutants were purified similarly. Human NuMA<sup>1,807–1,987</sup> was purified by nickel affinity and cation-exchange. To map the minimal interacting regions, Pins<sup>25–444</sup>:Insc<sup>252–263</sup> was incubated with trypsin in a 30:1 wt:wt ratio for 1 h at 4 °C, and analyzed by ESI-MS (ProMiFa). Human LGN:Gai<sup>GDP</sup> was produced from insect cells by colysis with Gai<sup>26–354</sup>, and purified as reported (1). Human Insc:LG N:Gai<sup>GDP</sup> complex was generated by coinfection with two baculoviruses. For crystallization studies, the proteolyzed Pins<sup>25–406</sup>:Insc<sup>303–340</sup> was concentrated up to 10 mg/mL in 10 mM Hepes pH 7.5, 0.1 M NaCl and 1 mM DTT.

**Crystallization and Crystal Structure Determination.** Pins<sup>25–406</sup>:Insc<sup>303–340</sup> was crystallized by hanging-drop vapor diffusion at 20 °C with a reservoir containing 0.1 M Tris-HCl pH 8.5, 0.2 M Magnesium chloride hexahydrate and 15% PEG 4000. For data collection, crystals were transferred to a cryo buffer (reservoir buffer supplemented with 20% ethylene glycol), and flash-frozen in liquid nitrogen. Crystallization experiments were performed at the Crystallography Unit of the IFOM-IEO Campus (Milan). X-ray diffraction data were collected at beamline ID23-1 at European Synchrotron Radiation Facility (Grenoble). Data were processed with HKL2000 (2). Initial phases were derived using SHELX in hkl2map (3). Model building was initiated with helical fragments placed into the electron density by Phenix (4), and completed using iterative cycles of manual model building in

COOT (5) and restrained refinement. The final model contains residues 39–386 of Pins<sup>TPR</sup>, and residues 307 to 335 of dInsc<sup>PEPT</sup>. The loop 369–374 of Pins<sup>TPR</sup> connecting the  $\alpha$ B8 helix of the last TPR with the capping helix  $\alpha$ C is missing as the density in this region is rather poor. For analogous reasons, only a poly-Ala model could be built for the terminal  $\alpha$ C helix. Data statistics are shown in Table S1.

**In Vitro Binding Assays.** To test the effect of point mutations, GST-dInsc<sup>303–340</sup>, GST-hInsc<sup>24–58</sup>, and GST-NuMA<sup>1,886–1,914</sup> (0.2  $\mu$ M) adsorbed on GSH-beads were incubated for 1 h at 4 °C with 0.2–0.4  $\mu$ M of the chosen TPR construct in a buffer containing 10 mM Hepes pH 7.5, 0.1 M NaCl, 5% glycerol, 0.1% Triton X-100, 0.1% Tween20 and 0.1% Na-deoxycholate.

**ITC.** Lyophilized dInsc<sup>303–340</sup>, hInsc<sup>24–58</sup>, and NuMA<sup>1,886–1,914</sup> peptides and TPR domains were dialyzed against 10 mM Hepes pH 7.5, 0.15 M NaCl and 5% glycerol. ITC measurements were performed on a MicroCal VP-ITC (MicroCal, Inc).

**Fluorescence Polarization.** Fluorescence polarization measurements were performed on an Infinite F200 (Tecan). Fluorescein-labeled NuMA<sup>PEPT</sup> (15 nM) was incubated with 250 nM LGN<sup>TPR</sup> in the presence of increasing concentration of unlabeled hInsc<sup>PEPT</sup> in 10 mM Hepes pH 7.5, 0.15 M NaCl, 0.5 mM EDTA and 1 mM DTT. A similar experiment was performed titrating unlabeled NuMA<sup>PEPT</sup> into a mixture of fluorescein-hInsc<sup>PEPT</sup>.

1. Tall GG, Gilman AG (2005) Resistance to inhibitors of cholinesterase 8A catalyzes release of Galphai-GTP and nuclear mitotic apparatus protein (NuMA) from NuMA/LGN/Galphai-GDP complexes. *Proc Natl Acad Sci USA* 102:16584–16589.
2. Minor ZOaW (1997) Processing of X-ray diffraction data collected in oscillation mode. *Methods in Enzymology* Volume 276:307–326.
3. Pape T, Schneider TR (2004) HKL2MAP: a graphical user interface for phasing with SHELX programs. *J Appl Cryst* 37:843–844.

4. Adams PD, Grosse-Kunstleve RW, Hung LW, Ioerger TR, McCoy AJ, Moriarty NW, Read RJ, Sacchettini JC, Sauter NK, Terwilliger TC (2002) PHENIX: building new software for automated crystallographic structure determination. *Acta Crystallogr D Biol Crystallogr* 58:1948–1954.
5. Emsley P, Cowtan K (2004) COOT: Model-building tools for molecular graphics. *Acta Cryst D60*:2126–2132.

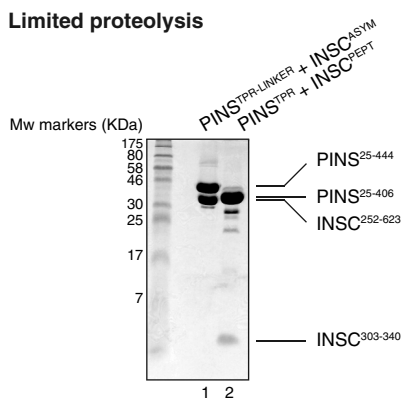

Fig. S1. SDS-PAGE of the untreated and trypsinized sample that was submitted to Mass Spectrometry analysis.

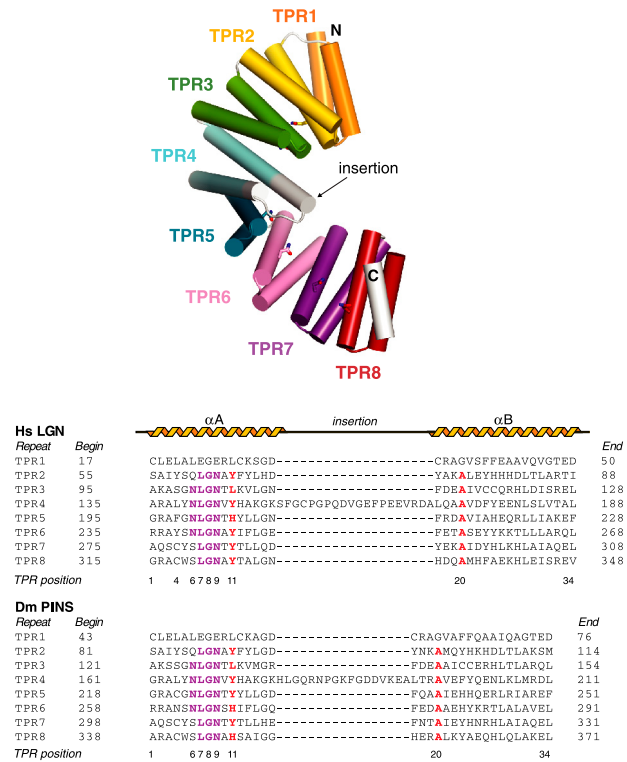

**Fig. S2.** Top: cartoon drawing of the Pins<sup>TPR</sup> architecture showing the TPRs. Invariant Asn are shown in sticks. Bottom: alignment of the TPR motifs of LGN and Pins. The structure-based alignment of TPR sequences of LGN and Pins highlights the presence of NLGN motifs in the  $\alpha$ A helix (in purple), and of conserved hydrophobic residues (in red) conforming to the canonical TPR consensus (shown at the bottom). The presence of a 17-20 residues insertion between helix  $\alpha$ A and  $\alpha$ B of TPR4 is visible in both proteins.

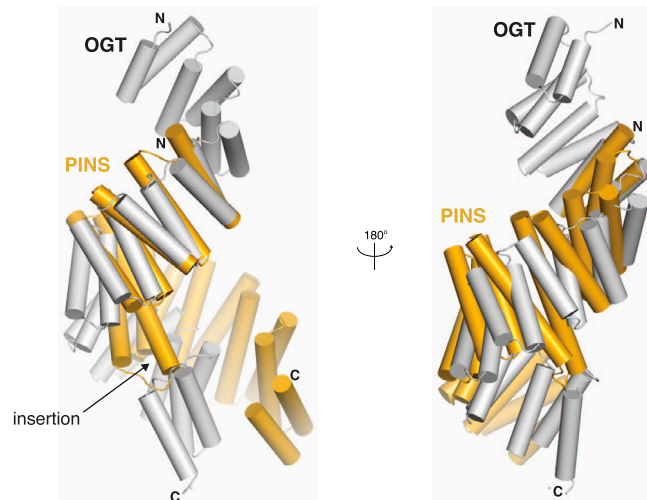

**Fig. S3.** Structural comparison of Pins<sup>TPR</sup> and OGT. The topological features of the Pins<sup>TPR</sup> superhelical arrangements were compared with OGT using the server Rapido, which revealed the presence of an invariant rigid body consisting of the first TPR of Pins<sup>TPR</sup> (residues 42 to 70) and the third TPR of OGT (residues 112 to 140). Superposition of Pins<sup>TPR</sup> (in gold) and OGT (in light gray) on this rigid body shows an outward displacement of the helical axis of Pins<sup>TPR</sup> caused by the TPR4 insertion, which would otherwise clash on the following helical turn. Two orthogonal views are shown.

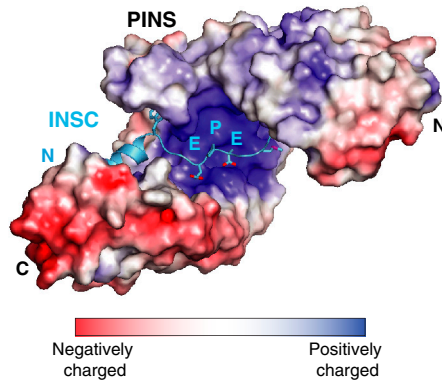

Fig. S4. Surface views of Pins<sup>TPR</sup> colored by electrostatic potential. The EPE<sup>Insc</sup> triplet is shown in sticks.

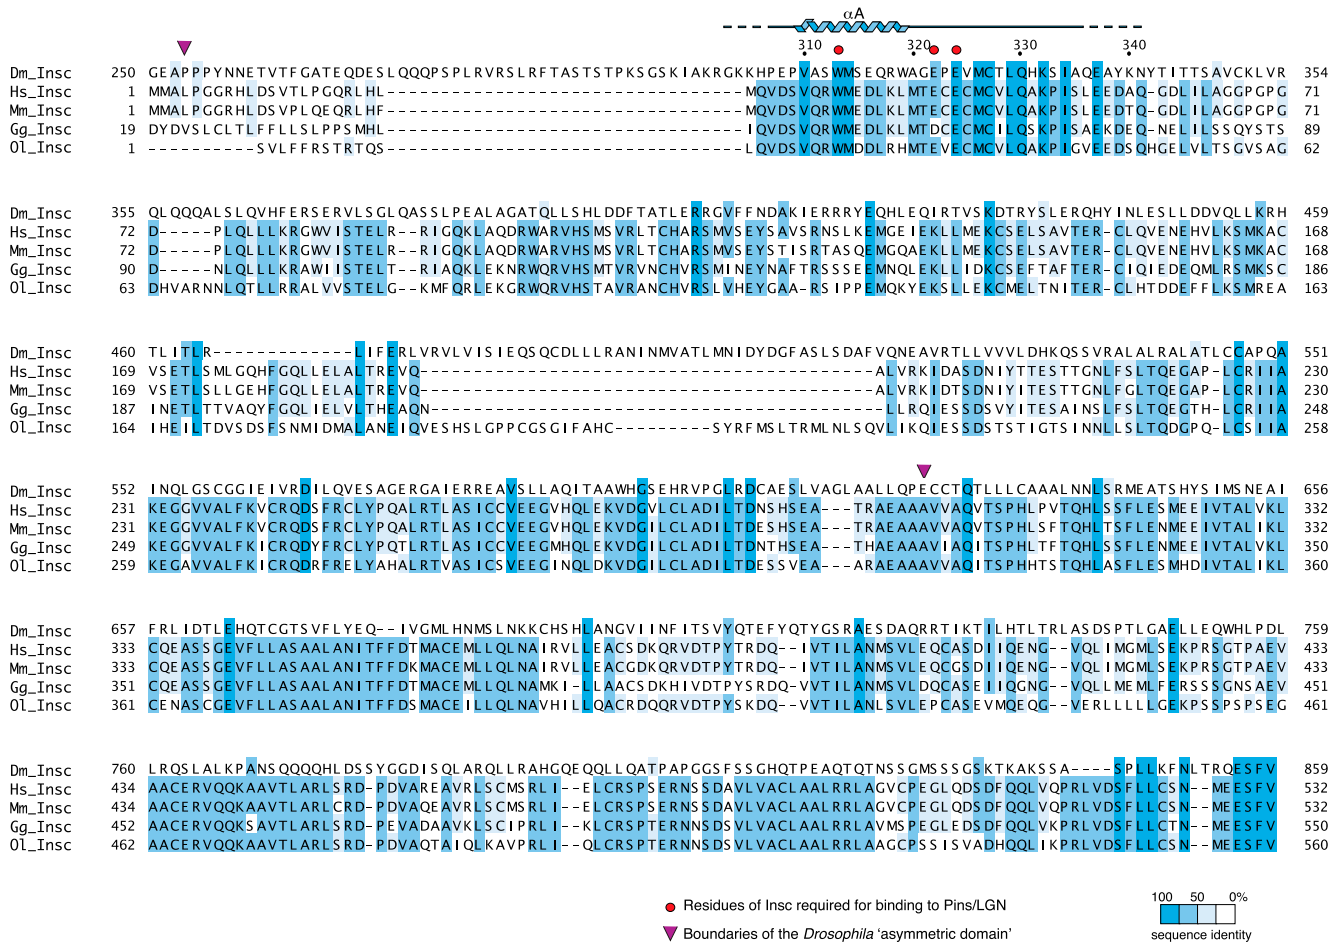

Fig. S5. Sequence alignment of Insc orthologs. Insc residues are colored according to their conservation, which was calculated based on alignment of five orthologs from *Drosophila melanogaster*, *Homo sapiens*, *Mus musculus*, *Gallus gallus* and *Oryzias latipes* (*Medaka*). The secondary structure of the region corresponding to dInsc<sup>PEPT</sup> as derived from structural analysis is displayed on top of the alignment, with the residues required for the interaction with Pins<sup>TPR</sup> indicated by red circles. Purple triangles mark the boundaries of the *Drosophila* asymmetric domain.

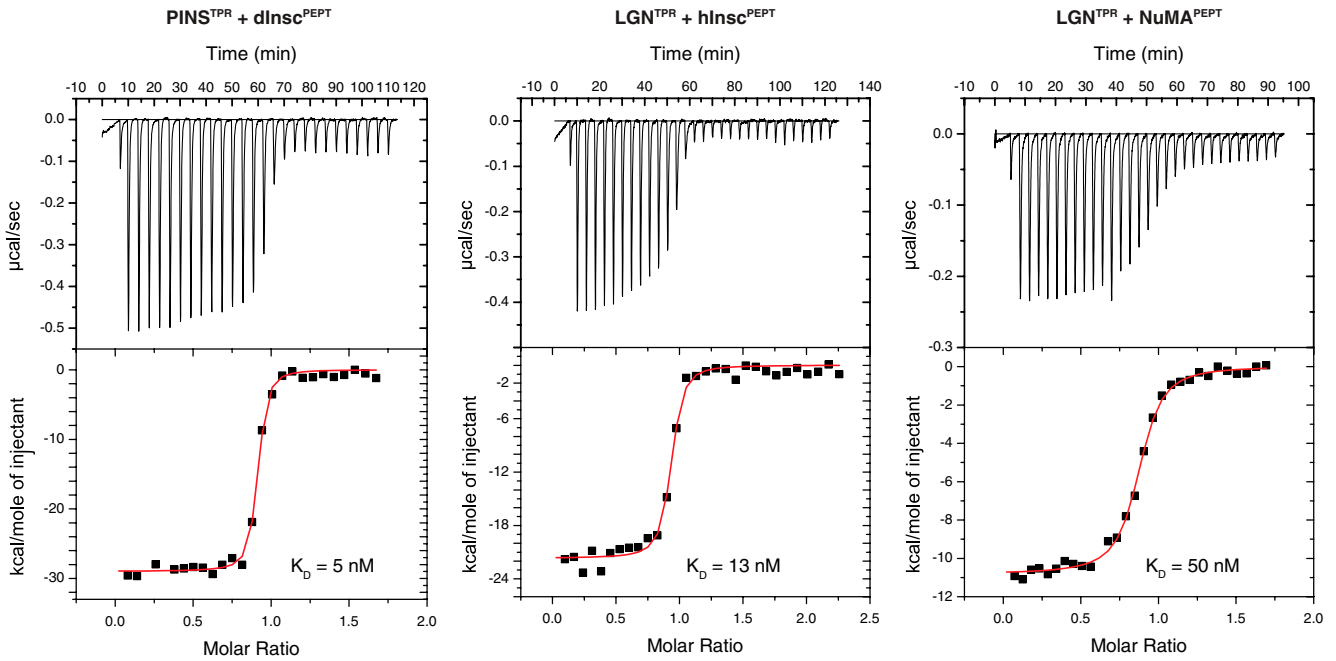

**Fig. S6.** Measurement of binding affinities between Pins<sup>T<sub>PR</sub></sup>:dlnc<sup>PE<sub>PT</sub></sup>, LGN<sup>T<sub>PR</sub></sup>:hlnc<sup>PE<sub>PT</sub></sup>, and LGN<sup>T<sub>PR</sub></sup>:NuMA<sup>PE<sub>PT</sub></sup>. Isothermal Titration Calorimetry experiments revealed that Pins<sup>T<sub>PR</sub></sup> binds dlnc<sup>PE<sub>PT</sub></sup> with an affinity comparable to the one of LGN<sup>T<sub>PR</sub></sup> for hlnc<sup>PE<sub>PT</sub></sup>, with dissociation constants of 5 nM and 13 nM respectively. NuMA<sup>PE<sub>PT</sub></sup> binds LGN<sup>T<sub>PR</sub></sup> with a lower affinity, with a  $K_D$  of 50 nM. All reactions are exothermic and exhibit a 1:1 stoichiometry.

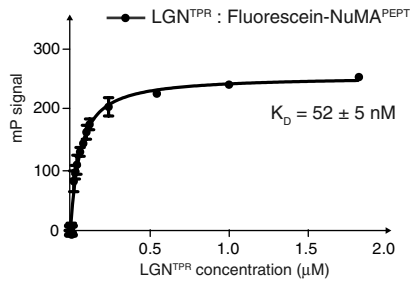

**Fig. S7.** Fluorescence polarization measurement of the binding affinity between LGN<sup>T<sub>PR</sub></sup> and NuMA<sup>PE<sub>PT</sub></sup>. LGN<sup>T<sub>PR</sub></sup> was titrated into 15 nM of fluorescein-labeled NuMA<sup>1886–1914</sup>. Fitting of the polarization curve yielded a dissociation constant of 52 nM, in agreement with the value obtained for the same reaction by ITC (Fig S6). The experiment established conditions for the fluorescence polarization-based competition assays presented in Fig. 4C.



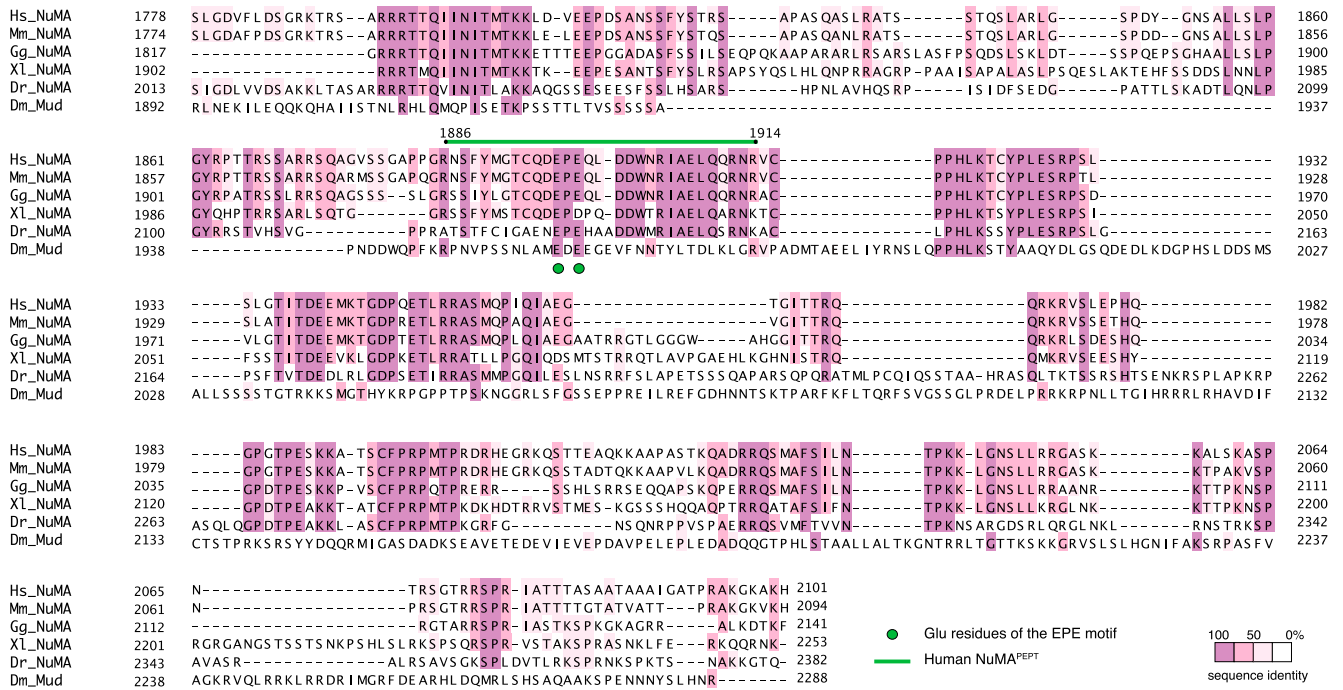

**Fig. S9** Sequence alignment of the C-terminal portion of NuMA orthologs. Coloring of NuMA reflects the conservation among homologues from *Homo sapiens*, *Mus musculus*, *Gallus gallus*, *Xenopus laevis*, *Danio rerio*, and *Drosophila melanogaster*. The sequence of human NuMA<sup>EPE</sup> encompassing the LGN<sup>TPR</sup> binding site is indicated in green on top of the alignment, with the invariant glutamic acid residues of the EPE motif marked as green circles. *Drosophila* Mud shares little sequence similarity with the other NuMA orthologs even in the Pins-binding region, where consecutive EPE-EGE triplets are present.

**Table S1. Data Collection and Refinement Statistics**

| Data set                                | Pins-Insc native      | Pins-Insc SeMet SAD   |
|-----------------------------------------|-----------------------|-----------------------|
| Beamline                                | ESRF ID23-1           | ESRF ID23-1           |
| Space group                             | C2                    | C2                    |
| Wavelength (Å)                          | 0.979                 | 0.979                 |
| Unit cell dimensions (Å)                | 160.2                 | 159.29                |
|                                         | 64.23                 | 64.20                 |
|                                         | 107.60                | 107.20                |
|                                         | $\beta = 117.9^\circ$ | $\beta = 118.2^\circ$ |
| Resolution (Å) *                        | 25.0–2.1 (2.18–2.1)   | 20.0–3.0 (3.1–3.0)    |
| Total observations                      | 472,231               | 733,917               |
| Unique reflections                      | 56,295                | 19,213                |
| Data completeness (%)                   | 98.7 (96.7)           | 99.8 (98.9)           |
| R <sub>sym</sub> (%) †                  | 5.6 (22.4)            | 11.4 (29.9)           |
| I/σ                                     | 12.5 (2.3)            | 11.4 (3.5)            |
| Refinement                              |                       |                       |
| Resolution range (Å)                    | 23.5–2.1              |                       |
| R <sub>work</sub> / R <sub>free</sub> † | 20.8/25.6             |                       |
| Number of protein atoms                 | 5,755                 |                       |
| Number of solvent atoms                 | 487                   |                       |
| rmsd bond lengths (Å)                   | 0.019                 |                       |
| rmsd bond angles (°)                    | 1.59                  |                       |
| Mean B-factor protein (Å <sup>2</sup> ) | 42.1                  |                       |
| Ramachandran values                     |                       |                       |
| Favored (%)                             | 98.1                  |                       |
| Allowed (%)                             | 1.9                   |                       |
| Outliers (%)                            | 0                     |                       |

\*Values in parentheses refer to the outer resolution shell.

†R<sub>free</sub> is equivalent to R<sub>conv</sub> for a 5% subset of reflections not used in the refinement.
